# Supplementary material
Source: PubMed Central journal article supplement (PMC6592848)
Supplement: NIHMS1027651-supplement-Supplemental_Data.pdf [file NIHMS1027651-supplement-Supplemental_Data.pdf]

## Supplementary Materials for

### **Eosinophils increase airway sensory nerve density in mice and in human asthma**

Matthew G. Drake\*, Gregory D. Scott, Emily D. Blum, Katherine M. Lebold, Zhenying Nie, James J. Lee, Allison D. Fryer, Richard W. Costello, David B. Jacoby

\*Corresponding author. Email: [drakem@ohsu.edu](mailto:drakem@ohsu.edu)

Published 5 September 2018, *Sci. Transl. Med.* **10**, eaar8477 (2018)  
DOI: 10.1126/scitranslmed.aar8477

#### **The PDF file includes:**

Fig. S1. Airway innervation was not associated with sex, body mass index, or age.  
Table S1. Raw data of airway nerve modeling and eosinophilia in mice.  
Legends for movies S1 to S3

#### **Other Supplementary Material for this manuscript includes the following:**

(available at [www.sciencetranslationalmedicine.org/cgi/content/full/10/457/eaar8477/DC1](http://www.sciencetranslationalmedicine.org/cgi/content/full/10/457/eaar8477/DC1))

Movie S1 (.mp4 format). Quantitative 3D model of airway epithelial sensory nerves from a healthy nonasthmatic subject.

Movie S2 (.mp4 format). Quantitative 3D model of airway epithelial sensory nerves from a subject with moderate persistent asthma.

Movie S3 (.mp4 format). Quantitative 3D model of airway epithelial sensory nerves costained for substance P from a subject with moderate persistent asthma.

## SUPPLEMENTARY MATERIALS

### Supplemental Figure S1

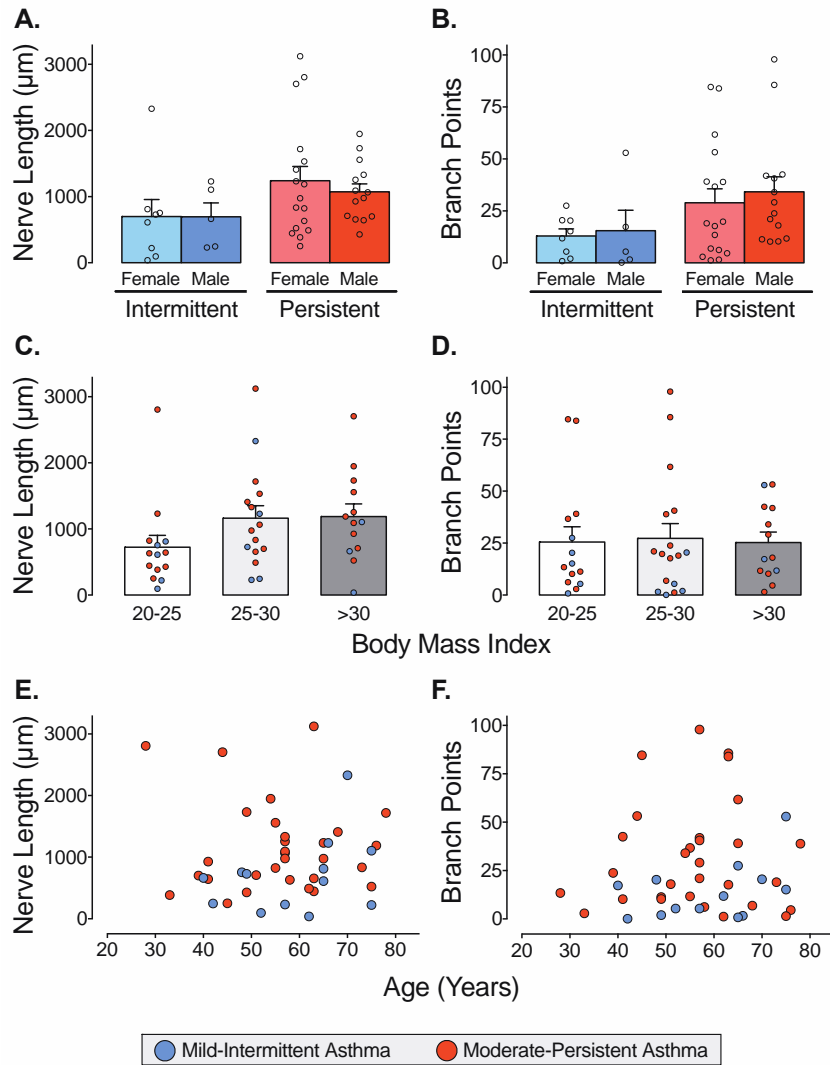

**Fig. S1. Airway innervation was not associated with sex, body mass index, or age.**

**A-B)** Nerve length and branch points in men and women with mild-intermittent (Intermittent, blue) or moderate-persistent (Persistent, red) asthma.  $n=13$  and  $31$  respectively. **C-D)** Nerve length and branch points in patients with asthma stratified by body-mass index. Dot colors correspond with asthma treatment group. Mild-intermittent asthmatics are labeled blue and

moderate-persistent asthmatics are labeled red. n=43. **E-F)** Correlation between nerve length or branch points and patient age. Dot colors correspond with asthma treatment group. Mild-intermittent asthmatics are labeled blue and moderate-persistent asthmatics are labeled red. n=43. A-D data are presented as means  $\pm$  SEM. Statistical significance was determined by *t* test (unpaired, two tailed; A-B), one-way ANOVA with a Bonferroni *post-hoc* test (C-D) and linear regression analysis (E-F).

**Table S1. Raw data of airway nerve modeling and eosinophilia in mice.**

**Proximal Trachea**

| <b>Nerve Length</b> |      |      |      |      |      | <b>Mean</b>    | <b>SEM</b>   |
|---------------------|------|------|------|------|------|----------------|--------------|
| <b>WT</b>           | 1102 | 892  | 629  | 1644 | 1145 | <b>1082.4</b>  | <b>167.6</b> |
| <b>II5tg</b>        | 1366 | 1690 | 2148 | 3282 |      | <b>2121.6*</b> | <b>418.6</b> |
| <b>PHIL</b>         | 633  | 1123 | 1118 | 933  |      | <b>952.0</b>   | <b>115.1</b> |
| <b>II5tg/PHIL</b>   | 1727 | 2179 | 1108 | 1203 |      | <b>1554.5</b>  | <b>248.9</b> |

| <b>Branch Points</b> |    |    |    |     |      | <b>Mean</b>  | <b>SEM</b>  |
|----------------------|----|----|----|-----|------|--------------|-------------|
| <b>WT</b>            | 42 | 43 | 19 | 62  | 32.8 | <b>39.6</b>  | <b>7.0</b>  |
| <b>II5tg</b>         | 65 | 72 | 86 | 112 |      | <b>83.8*</b> | <b>10.4</b> |
| <b>PHIL</b>          | 14 | 30 | 37 | 24  |      | <b>26.3</b>  | <b>4.8</b>  |
| <b>II5tg/PHIL</b>    | 59 | 70 | 34 | 32  |      | <b>48.7</b>  | <b>9.6</b>  |

**Carina**

| <b>Nerve Length</b> |     |      |     |      |     |     |     |     | <b>Mean</b>   | <b>SEM</b>   |
|---------------------|-----|------|-----|------|-----|-----|-----|-----|---------------|--------------|
| <b>WT</b>           | 270 | 458  | 361 | 481  | 674 | 388 | 395 | 306 | <b>416.6</b>  | <b>44.4</b>  |
| <b>II5tg</b>        | 566 | 1243 | 640 | 1181 | 583 |     |     |     | <b>842.6*</b> | <b>151.6</b> |
| <b>PHIL</b>         | 265 | 696  | 433 | 427  | 320 | 300 | 405 | 569 | <b>426.9</b>  | <b>51.2</b>  |
| <b>II5tg/PHIL</b>   | 463 | 319  | 407 | 389  |     |     |     |     | <b>394.7</b>  | <b>29.8</b>  |

| <b>Branch Points</b> |    |    |    |    |      |   |   |    | <b>Mean</b>  | <b>SEM</b> |
|----------------------|----|----|----|----|------|---|---|----|--------------|------------|
| <b>WT</b>            | 6  | 11 | 7  | 8  | 11.7 | 9 | 8 | 5  | <b>8.2</b>   | <b>0.8</b> |
| <b>II5tg</b>         | 10 | 24 | 15 | 16 | 12   |   |   |    | <b>15.4*</b> | <b>2.4</b> |
| <b>PHIL</b>          | 5  | 12 | 9  | 7  | 5    | 4 | 8 | 13 | <b>7.9</b>   | <b>1.2</b> |
| <b>II5tg/PHIL</b>    | 4  | 7  | 8  | 5  |      |   |   |    | <b>6.0</b>   | <b>0.9</b> |

| <b>BAL Eosinophils</b> |   |   |   |   |    | <b>Mean</b>  | <b>SEM</b> |
|------------------------|---|---|---|---|----|--------------|------------|
| <b>WT</b>              | 0 | 0 | 0 | 0 | 0  | <b>0.0</b>   | <b>0.0</b> |
| <b>II5tg</b>           | 6 | 7 | 8 | 6 | 30 | <b>11.4*</b> | <b>4.8</b> |
| <b>PHIL</b>            | 0 | 0 | 0 | 0 | 0  | <b>0.0</b>   | <b>0.0</b> |
| <b>II5tg/PHIL</b>      | 0 | 0 | 0 | 0 | 0  | <b>0.0</b>   | <b>0.0</b> |

\*  $p < 0.05$  compared to all other groups

## **Supplementary Movies:**

**Movie S1. Quantitative 3D model of airway epithelial sensory nerves from a healthy nonasthmatic subject.** Representative video of three-dimensional nerve modeling in an intact bronchoscopic airway biopsy from a non-asthmatic healthy subject. Airway epithelial nerve models are generated from raw images immunolabeled with antibody to the pan-neuronal protein PGP9.5 (green) and DAPI (blue). Branch points are represented as red spheres in the model. Nerve models allow precise quantification of nerve length and branching. Videos were created in Imaris.

**Movie S2. Quantitative 3D model of airway epithelial sensory nerves from a subject with moderate persistent asthma.** Representative video of three-dimensional nerve modeling in an intact bronchoscopic airway biopsy from a subject with moderate-persistent asthma. Airway epithelial nerve models generated from raw images immunolabeled with antibody to the pan-neuronal protein PGP9.5 (green), eosinophil peroxidase (pink) and DAPI (blue) allow quantification of nerve morphology and eosinophils in airway parenchyma. Branch points are represented as red spheres in the model. Subjects with moderate-persistent asthma have significantly increased airway innervation manifesting as longer nerve length and more branching compared to mild-intermittent asthma and non-asthmatic healthy subjects.

**Movie S3. Quantitative 3D model of airway epithelial sensory nerves costained for substance P from a subject with moderate persistent asthma.** Representative video of three-dimensional nerve modeling co-stained for substance P in an intact bronchoscopic airway biopsy

from a subject with moderate-persistent asthma. Airway epithelial nerves were immunolabeled with antibody to the pan-neuronal protein PGP9.5 (green), substance P (pink) and DAPI (blue). Branch points are represented as red spheres in the model. Neuronal substance P expression was significantly increased in moderate-persistent asthma compared to mild-intermittent asthma and non-asthmatic healthy subjects.
